# Supplementary material for: cAMP receptor protein regulates mouse colonization, motility, fimbria-mediated adhesion, and stress tolerance in uropathogenic Proteus mirabilis
Source: PubMed Central journal article supplement (PMC5544767; doi:10.1038/s41598-017-07304-7), 2017-08-04
Supplement: 41598_2017_7304_MOESM2_ESM.pdf [file 41598_2017_7304_MOESM2_ESM.pdf]

1 **cAMP receptor protein regulates mouse colonization, motility, fimbria-mediated**

2 **adhesion, and stress tolerance in uropathogenic *Proteus mirabilis***

3

4 Yi-Lin Tsai, Hsiung-Fei Chien, Kuo-Tong Huang, Wen-Yuan Lin & Shwu-Jen Liaw

5

6 **Supplementary Information**

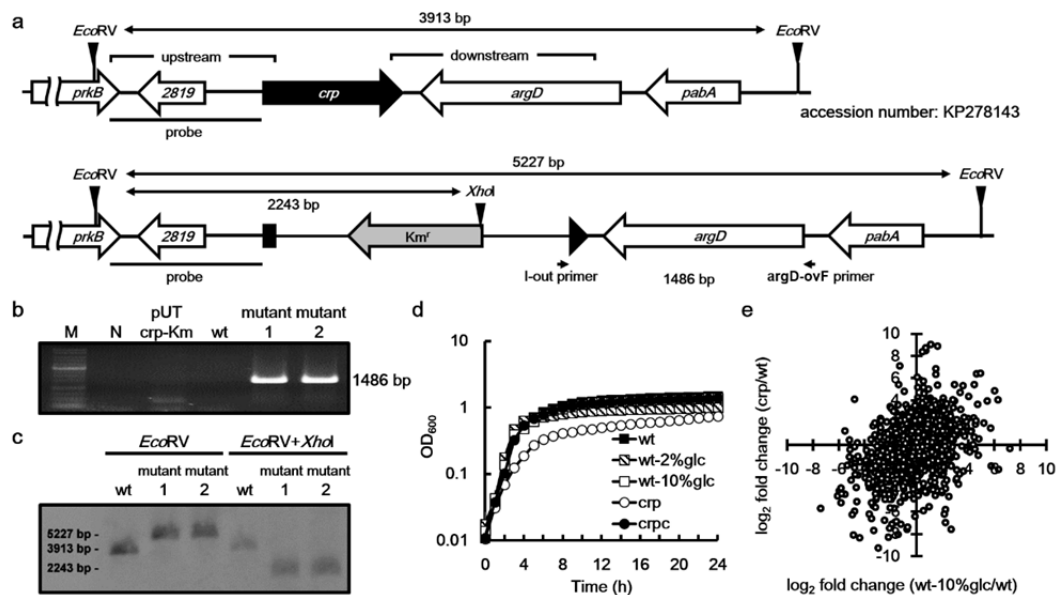

7

8 **Supplementary Figure S1. (a)(b)(c)** Construction and verification of *P. mirabilis crp*

9 mutant. **(a)** Insertion mutagenesis of the wild-type *crp* gene with the  $Km^r$  cassette

10 (containing the *aph3'-Ia* gene from pUT-Km1) was performed as described in the

11 Supplemental Material. Upstream and downstream regions of the *crp* gene amplified

12 are indicated. Restriction enzyme cleavage sites are indicated by vertical triangles. **(b)**

13 PCR verified the insertion of the  $Km^r$  cassette, conferring kanamycin resistance,

14 within the *crp* gene. PCR with I-out and *argD*-ovF primers was performed using the

15 control plasmid pUTcrp-Km and chromosomal DNA from wild-type, *crp* mutant 1 or

16 *crp* mutant 2 as a template. Primer binding sites are shown in **a**. The mutant DNA

17 produced a 1486-bp PCR product but not in wild-type. M, 1-kb DNA marker; N,

18 negative control; wt, wild-type. **(c)** Southern blot hybridization verified the *crp*

19 mutant. Chromosomal DNA of wild-type, mutant 1 and mutant 2 was digested with

20 EcoRV and EcoRV/XhoI, respectively, before Southern blot hybridization using the  
21 labeled probe DNA indicated in **a**. EcoRV digestion resulted in a 3913-bp fragment in  
22 the wild-type but a 5227-bp fragment in mutants. EcoRV/XhoI digestion produced a  
23 3913-bp fragment in the wild-type but a 2243-bp fragment in mutants. wt, wild-type.

24 **(d)** Growth curves of the wild-type *P. mirabilis* in the absence or presence of glucose,  
25 the *crp* mutant and *crp*-complemented strain. The bacterial growth was expressed as  
26 the optical density at 600 nm (OD<sub>600</sub>) on a log<sub>10</sub> scale. Overnight bacterial cultures  
27 were diluted and grown to an OD<sub>600</sub> of 0.01 and the growth was monitored at 1-h  
28 intervals. The data represent the averages and standard deviations of three  
29 independent experiments. wt, wild-type; *crp*, *crp* mutant; *crpc*, *crp*-complemented  
30 strain; wt-2%glc, wild-type with 2% glucose; wt-10%glc, wild-type with 10% glucose.

31 **(e)** Correlation of gene expression between *crp* mutant and 10% glucose-treated  
32 wild-type *P. mirabilis*. Total RNA from wild-type (wt), 10% glucose-treated  
33 wild-type (wt-10%glc), or *crp* mutant (*crp*) was analyzed by RNA-seq. The x-axis  
34 indicates the log<sub>2</sub> fold-change value in reads per kilobase per million (RPKM) of  
35 10%glc-treated wild-type relative to the wild-type and the y-axis indicates the log<sub>2</sub>  
36 fold-change value in RPKM of *crp* mutant relative to the wild-type. Each dot  
37 represents one gene.

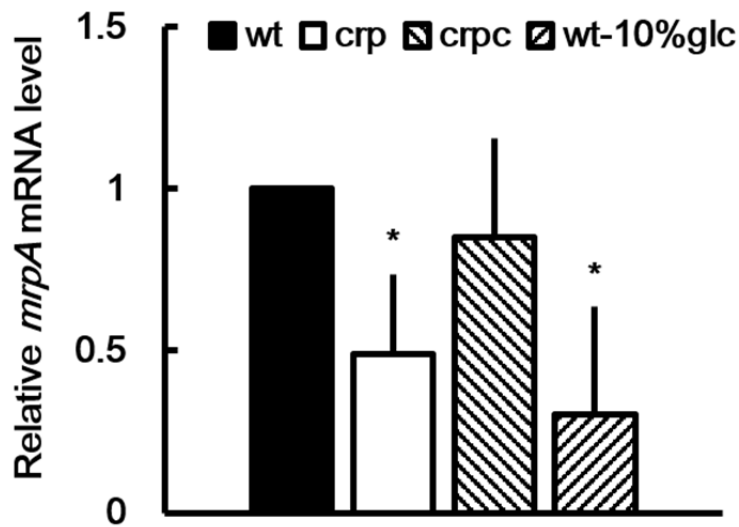

38

39 **Supplementary Figure S2.** Loss of *P. mirabilis* *crp* or high glucose affected *mrpA*

40 expression. The *mrpA* mRNA amounts in the wild-type in the absence (wt) or

41 presence of 10% glucose (wt-10%glc), *crp* mutant (crp), and *crp*-complemented strain

42 (crpc) were quantified by real-time RT-PCR using bacterial cultures after incubation

43 for 24 h. The value obtained for the wild-type cells was set at 1. The data represent

44 the averages and standard deviations of three independent experiments. The

45 significant difference from the wild-type is indicated with the asterisk (\*,  $P < 0.05$  by

46 Student's *t* test).

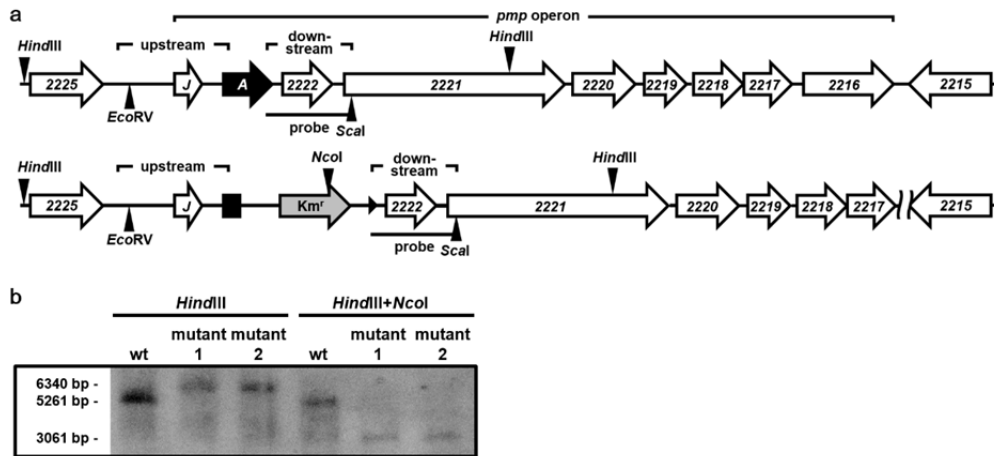

47

48 **Supplementary Figure S3.** Construction and verification of *P. mirabilis pmpA*

49 mutant. (a) Insertion mutagenesis of the wild-type *pmpA* gene with the Km<sup>r</sup> cassette

50 (containing the *aph3'-IIa* gene from pKD4) was performed as described in the

51 Supplemental Material. Upstream and downstream regions of the *pmpA* gene

52 amplified are indicated. Restriction enzyme cleavage sites are indicated by vertical

53 triangles. (b) Southern blot hybridization verified the insertion of the Km<sup>r</sup> cassette

54 within the *pmpA* gene. Chromosomal DNA of the wild-type, mutant 1 and mutant 2

55 was digested with HindIII and HindIII/NcoI, respectively, before Southern blot

56 hybridization using the labeled probe DNA indicated in a. HindIII digestion resulted in

57 a 5261-bp fragment in the wild-type but a 6340-bp fragment in mutants. HindIII/NcoI

58 digestion produced a 5261-bp fragment in the wild-type but a 3061-bp fragment in

59 mutants. wt, wild-type.

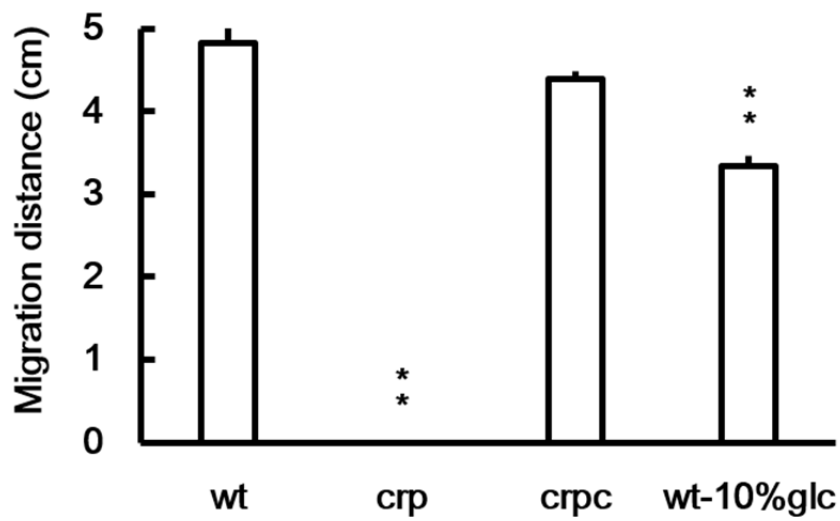

60

61 **Supplementary Figure S4.** Swimming migration of the wild-type *P. mirabilis* in the

62 absence or presence of 10% glucose, *crp* mutant and the *crp*-complemented strain.

63 Overnight cultures were inoculated centrally into the swimming agar (0.3%, w/v)

64 plates. The migration distance was measured at 16 h after inoculation. The data

65 represent the averages and standard deviations of three independent experiments. The

66 significant difference from the wild-type is indicated with the asterisk (\*\*,  $P < 0.01$  by

67 Student's *t* test). wt, wild-type; wt-10%glc, wild-type with 10% glucose; *crp*, *crp*

68 mutant; *crpc*, *crp*-complemented strain.

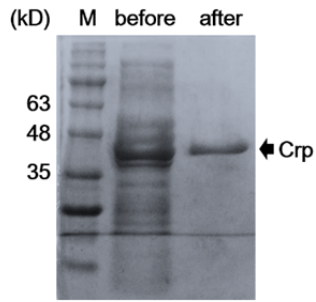

69

70 **Supplementary Figure S5.** The His-tagged recombinant Crp protein before and after

71 purification. *E. coli* BL21(DE3) cells carrying the plasmid for expression of

72 His-tagged recombinant Crp were induced by 0.1 mM IPTG for 3 h at 25°C, the cell

73 pellet was collected and total proteins were extracted by sonication and centrifugation.

74 The soluble fraction was analyzed by 12% SDS-PAGE before and after being purified

75 by a Ni<sup>2+</sup>-nitrilotriacetic acid column. M, protein ladder.

*ptsG*

*E. coli* MG1655

TATTGTGACATATGTTTTGTCAAAAATGTGCAACTTCTCCAATGATCTGAAGTTGAAACGTGATAGCCGTCAAACAAAATTGGCACTG  
AATTATTTACTCTGTGTAATAAATAAAGGGCGCTTAGATGCCCTGTACACGGCGAGGCTCTCCCCCTTGCCACGCGTGAGAAC  
GTAAAAAAGCACCCATACTCAGGAGCACTCTCAATTATG<sub>*ptsG* translation start site</sub>

*P. mirabilis* N2

AAACGTGACAGCTATCATATATCAATAATGGATTTATTTATGATGTAAATAAATAGAGCTTATTATTAGATAAGTTAATTGAATAA  
ACCTACCTTAACCTTAAACAAATAAAAACTTATAACACATACAACCCATATTCGGGAGTCTGCTTGATG<sub>*ptsG* translation start site</sub>

*crp*

*E. coli* MG1655

AAGCGCAGCTGGGTCATGCTGAAGCGAGACACAGGAGACACAAAGCGAAAGCTATGCTAAAAACAGTCAGGATGCTACAGTAAT  
ACATTGATGTACTGCATGATGCAAAGGACGTCACATTACCGTGCAGTACAGTTGATAGCCCTTCCCAGGTAGCGGGAAGCATA  
TTTCGGCAATCCAGAGACAGCGGCTTATCTGGCTCTGGAGAAAGCTTATAACAGAGGATAACCGCGCATG<sub>*crp* translation start site</sub>

*P. mirabilis* N2

TATTATAATCTATTCTTATTAACTTTCCGAATTCTCAGGAAGTTAATCGGTAAGATAGGATTTAAGCACGCTGTATCAAAGGG  
TGTCATCCGTTTTAAAGGCTGCATTAACGTACAGAGGATAACCGGAATG<sub>*crp* translation start site</sub>

*cyaA*

*E. coli* MG1655

TTTACGGTCAATCAGCAAGGTGTAAATTGATCACGTTTAGACCATTTTTTCGTCGTGAAACTAAAAAACAGCGCGGAAAAAT  
GGTAACGGTTACCTTTGACATACGAAATATCCCGAATGCCGCGTTACCCTTGATGTTGGCGGAATCACAGTCATGACGGGTAG  
CAAATCAGCGGATACGTCTTG<sub>*cyaA* translation start site</sub>

*P. mirabilis* N2

TTTACGCCTTGCTTGAAGGTGTAAATTGATCACGTTCCGAGATTTTGTTAGTAAAGTTTATCTATTAATAATTGAATAATTA  
GCTCGGTAATTTATAAACTCAGATTCTACTATTTCTTAGTATTGTTCCAGCGGAAACTCTTG<sub>*cyaA* translation start site</sub>

*hfq*

*E. coli* MG1655

GGTTGGGAAGGGTTCACTGGCTTGACAGTGAAAAACCAGAACAGGCGCGTGACGAAGTATTACAGGTTGTTGGTGCTATCGCA  
GGCTGAATGTGTACAATTGAGACGATCGTGCGCAATTTTTTTCAGAAATCGAAAGGTTCAAAGTACAAATAAGCATATAAGGAAAAAG  
AGAGAATG<sub>*hfq* translation start site</sub>

*P. mirabilis* N2

GGTTGGCATGATGTTCAATTGGTTAGATAGTGAAGATTTTGAACAGTCTCTTAACACTGTTTTGCAGGTAGTTAGTGCATAGATGGT  
AGGTTTTGTGTAAAATTGATAGTTGCTAAAGTGAATTTTTGAGTAGTTCAATTTTTTTCGAACCATTAGGTTCTAGTATAAAACAACAAA  
ATAAGGAAAACATAGAATG<sub>*hfq* translation start site</sub>

76

77 **Supplementary Figure S6.** The upstream regulatory regions of *ptsG*, *crp*, *cyaA* and

78 *hfq* of *P. mirabilis* N2 and *E. coli* MG1655 showing the putative Crp-cAMP binding

79 sites. Putative Crp-cAMP binding sites are underlined. The -10 and -35 boxes or the

80 transcription start site of the sigma 70 promoter is framed.



|                        |    |      |      |      |      |      |     |    |    |
|------------------------|----|------|------|------|------|------|-----|----|----|
| Crp ( $\mu\text{M}$ )  | 0  | 0.01 | 0.03 | 0.06 | 0.12 | 0.25 | 0.5 | 1  | 2  |
| cAMP ( $\mu\text{M}$ ) | 50 | 50   | 50   | 50   | 50   | 50   | 50  | 50 | 50 |

0.1  $\mu\text{g}$  negative control DNA

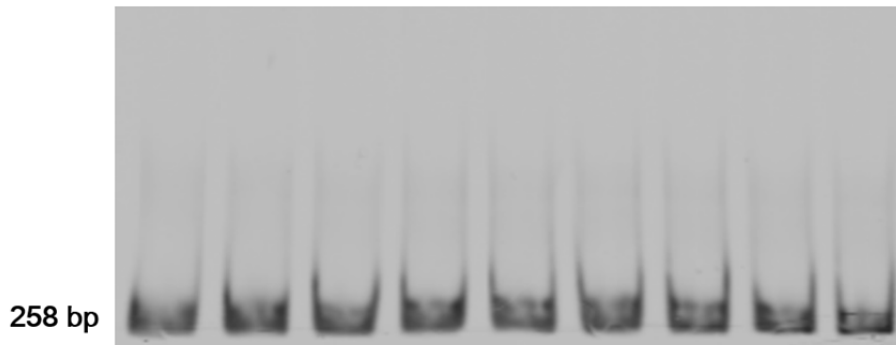

81

82 **Supplementary Figure S7.** Electrophoretic mobility shift assay of His-tagged Crp

83 and IRDye-labeled negative control DNA fragment. The 258-bp negative control

84 DNA fragment was amplified from the pGEM-T easy using the IRDye-labeled

85 M13F/M13R primers. The DNA product (0.1  $\mu\text{g}$ ) was incubated with the indicated

86 concentrations (0-2  $\mu\text{M}$ ) of Crp protein in the presence of cAMP. After protein-DNA

87 complex formation, the fragments were resolved on a 5% non-denaturing

88 polyacrylamide gel and the gel image was obtained by the quantitative infrared

89 fluorescent imaging system.

Fig. 3d

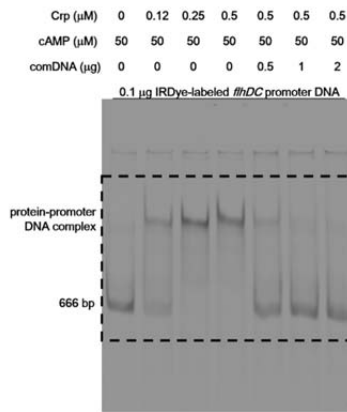

Fig. 4d

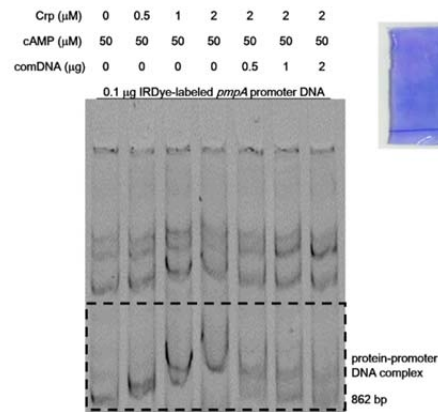

Fig. 3f

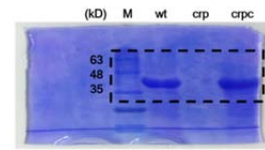

90

91 **Supplementary Figure S8.** Full-length images of gels presented in the main figures

92 3d, 3f and 4d.

93

94 **Supplementary Table S1.** Bacterial strains and plasmids used in this study.

| Strain or plasmid   | Genotype or relevant phenotype                                                                                                                                                                                                                     | Reference        |
|---------------------|----------------------------------------------------------------------------------------------------------------------------------------------------------------------------------------------------------------------------------------------------|------------------|
| <i>P. mirabilis</i> |                                                                                                                                                                                                                                                    |                  |
| wt                  | wild-type N2; Tet <sup>r</sup>                                                                                                                                                                                                                     | Clinical isolate |
| crp                 | wt derivative; <i>crp</i> knockout mutant; Km <sup>r</sup>                                                                                                                                                                                         | This study       |
| crpc                | <i>crp</i> mutant containing pGcrp-com; <i>crp</i> -complemented strain; Amp <sup>r</sup>                                                                                                                                                          | This study       |
| hfq                 | wt derivative; <i>hfq</i> knockout mutant; Km <sup>r</sup>                                                                                                                                                                                         | 1                |
| pmpA                | wt derivative; <i>pmpA</i> knockout mutant; Km <sup>r</sup>                                                                                                                                                                                        | This study       |
| pmpA/crp            | wt derivative; <i>pmpA/crp</i> double mutant; Km <sup>r</sup> Gm <sup>r</sup>                                                                                                                                                                      | This study       |
| rpoS                | wt derivative; <i>rpoS</i> knockout mutant; Km <sup>r</sup>                                                                                                                                                                                        | 1                |
| rpoSc               | <i>rpoS</i> mutant containing pGrpoS-com; <i>rpoS</i> -complemented strain; Amp <sup>r</sup>                                                                                                                                                       | 1                |
| <i>E. coli</i>      |                                                                                                                                                                                                                                                    |                  |
| DH5α                | <i>fhuA2 lac(del)U169 phoA glnV44 thi-1 hsdR17 Φ80' lacZ(del)M15 gyrA96 recA1 relA1 endA1</i>                                                                                                                                                      | Invitrogen       |
| S17-1 λ <i>pir</i>  | λ <i>pir</i> lysogen of S17-1 [ <i>thi pro hsdR' hsdM<sup>r</sup> recA</i> RP4 2-Tc::Mu-Km::Tn7 (Tp <sup>r</sup> Sm <sup>r</sup> )]; permissive host able to transfer suicide plasmids requiring the Pir protein by conjugation to recipient cells | Biomedical       |
| BL21(DE3)           | F <sup>-</sup> <i>ompT hsdS<sub>B</sub> (r<sub>B</sub><sup>-</sup> m<sub>B</sub><sup>-</sup>) gal dcm</i> (DE3)                                                                                                                                    | Invitrogen       |
| Plasmids            |                                                                                                                                                                                                                                                    |                  |
| pGEM-T Easy         | High-copy TA cloning vector; Amp <sup>r</sup>                                                                                                                                                                                                      | Promega          |
| pUT-Km1             | Suicide plasmid requiring the Pir protein for replication and containing a mini-Tn5 cassette containing Km <sup>r</sup> gene                                                                                                                       | 2                |
| pKD4                | pKD4 is a template plasmid for <i>frt</i> -flanked Km <sup>r</sup> cassette. The Km <sup>r</sup> cassette originally came from pCP15.                                                                                                              | 3                |
| pX1918GT            | A <i>xylE</i> -Gm <sup>r</sup> fusion cassettes-containing plasmid                                                                                                                                                                                 | 4                |
| pET32a(+)           | Expression vector containing T7 promoter; Amp <sup>r</sup>                                                                                                                                                                                         | Novagen          |
| 95                  | Tet, tetracycline; Amp, ampicillin; Gm, gentamicin; Km, kanamycin; Sm, streptomycin; Tp, trimethoprim.                                                                                                                                             |                  |
| 96                  |                                                                                                                                                                                                                                                    |                  |

97 **Supplementary Table S2.** Primers used in this study.

| Primer        | Sequence (5' to 3')                      | Description                                                                            |
|---------------|------------------------------------------|----------------------------------------------------------------------------------------|
| crp-upF       | <u>GTCGACTATCA</u> ACTATTGT<br>TGTTCCAGG | For <i>crp</i> knockout, and <i>crp</i> reporter assay. Paired with “XbaI-crp-upR”.    |
| XbaI-crp-upR  | <u>TCTAGATTGTGA</u> ATATGGCAG<br>TGTGA   |                                                                                        |
| XbaI-crp-dnF  | <u>TCTAGACGTGAA</u> ACTGTAGGC<br>CGTAT   | For <i>crp</i> knockout. Paired with “crp-dnR”.                                        |
| crp-dnR       | <u>GCATGCGCATC</u> CACTATTGAA<br>TAAAG   |                                                                                        |
| I-out         | GAGCTCGAATTCGGCCTAG                      | Check for <i>crp</i> knockout mutant. Paired with “argD-ovF”.                          |
| argD-ovF      | GTATAGCTAAATGTCGGTCAG<br>GT              |                                                                                        |
| crp-comF      | AATTGTACAGCTCGCTCAAC                     | For <i>crp</i> complementation. Paired with “crp-comR”.                                |
| crp-comR      | GCATGGCTTACGTACACTAT                     |                                                                                        |
| pmpA-upF      | <u>GCATGCTTGAG</u> ATAGACACCA<br>GCTAT   | For <i>pmpA</i> knockout, and <i>pmpA</i> reporter assay. Paired with “XbaI-pmpA-upR”. |
| XbaI-pmpA-upR | <u>TCTAGAAGGCTTT</u> TGCTGATT<br>TGACCA  |                                                                                        |
| XbaI-pmpA-dnF | <u>TCTAGACTGA</u> AGGTGAGTTTA<br>ACGCT   | For <i>pmpA</i> knockout. Paired with “pmpA-dnR”.                                      |
| pmpA-dnR      | <u>GTCGACTTGAT</u> GAACCGATCC<br>CTTGT   |                                                                                        |
| FRT-out       | CCTATTCCGAAGTTCCTATTC                    | Check for <i>pmpA</i> knockout mutant. Paired with “pmpA-upF”.                         |
| xylE-R        | AAGTCGTACCGGACCATCAG                     | Check for <i>pmpA/crp</i> double mutant. Paired with “argD-ovF”.                       |
| flhDC-reF     | GGGTAGATTCGCTTATTAATT<br>CTC             | For <i>flhD</i> reporter assay and EMSA. Paired with “flhDC-reR”.                      |
| flhDC-reR     | CTCTTTACATCCCGTCCGAT                     |                                                                                        |
| crp-purF      | <u>GGATCCATGGTT</u> CTCGGCAAG<br>CCGCAA  | For Crp-His <sub>6</sub> expression. Paired with “crp-purR”.                           |
| crp-purR      | <u>CTCGAGTTAAC</u> GAGTACCGTA<br>AACAACG |                                                                                        |
| ptsG-rtF      | CGCGAAACAAGCGGATAAA                      | For <i>ptsG</i> real-time RT-PCR. Paired with “ptsG-rtR”.                              |
| ptsG-rtR      | CGCAAGCGTGTAATACAAGC<br>A                |                                                                                        |
| crp-rtF       | CCGCCAATTAATTCAGGTCAA                    | For <i>crp</i> real-time RT-PCR. Paired with “crp-rtR”.                                |
| crp-rtR       | GCGTCATTGCATCAGGTTGTT                    |                                                                                        |
| hfq-rtF       | ACGGCATTAATTACAGGGTC                     | For <i>hfq</i> real-time RT-PCR.                                                       |

|                       |                                                    |                                                                                                          |
|-----------------------|----------------------------------------------------|----------------------------------------------------------------------------------------------------------|
| hfq-rtR               | AGA<br>GCTATGATGAGAAACAGGAC<br>GAGAA               | Paired with “hfq-rtR”.                                                                                   |
| cyaA-rtF              | TTGCATCGATGAGTGATGTG                               | For <i>cyaA</i> real-time RT-PCR.<br>Paired with “cyaA-rtR”.                                             |
| cyaA-rtR<br>flhDC-rtF | TATTGACCCATTGACGTTGC<br>CACGAGCATGGACATTAG         | For <i>flhDC</i> real-time RT-PCR.<br>Paired with “flhDC-rtR”.                                           |
| flhDC-rtR<br>mrpA-rtF | GCAGGATTGGCGGAAAGTT<br>GGTTCTTTAGGCATTGAAGG        | For <i>mrpA</i> real-time RT-PCR.<br>Paired with “mrpA-rtR”.                                             |
| mrpA-rtR<br>rpoS-rtF  | TCATTGTTACCATCACGCAG<br>GCCTTATTCGTGCTGTTG         | For <i>rpoS</i> real-time RT-PCR.<br>Paired with “rpoS-rtR”.                                             |
| rpoS-rtR<br>pmpA-rtF  | GACGAATAGTGCGGGTTT<br>AATGGCTTTTTCTGCGACTGT<br>T   | For <i>pmpA</i> real-time RT-PCR.<br>Paired with “pmpA-rtR”.                                             |
| pmpA-rtR              | TTGGTTAGCACTTTCGGTAGC<br>A                         |                                                                                                          |
| gfpuv-rtF             | TTCAATGCTTTTCCCGTTATCC                             | For <i>gfpuv</i> real-time RT-PCR.<br>Paired with “gfpuv-rtR”.                                           |
| gfpuv-rtR             | GCGTCTTG TAGTTCCCGTCAT<br>C                        |                                                                                                          |
| gyrB-rtF              | GACCCGTACGCTAAACAAC                                | Internal control for real-time<br>RT-PCR. Paired with<br>“gyrB-rtR”.                                     |
| gyrB-rtR<br>pmp-fpF   | AGAAATAACCGCAATCAGG<br>TACGTAAATCTCTAACAGGAG<br>CC | Amplification of <i>pmpA</i><br>promoter for DNase I<br>footprinting and EMSA.<br>Paired with “pmp-koR”. |
| pmp-koR<br>M13F       | AGGCTTTTGCTGATTTGACCA<br>CACGACGTTGTAAAACGAC       | M13 primers labelled with<br>IRDye or not for EMSA.<br>Paired with “M13R”.                               |
| M13R                  | GGATAACAATTCACACAGG                                |                                                                                                          |

98 The recognition sequences of endonucleases are indicated.

99 **Supplementary Methods**

100 **Construction of *P. mirabilis* mutants and *crp*-complemented strain.** Sequences  
101 flanking the *crp* gene was amplified by PCR using the primer pairs  
102 *crp*-upF/XbaI-*crp*-upR and XbaI-*crp*-dnF/*crp*-dnR, respectively for construction of  
103 *crp* mutant, and cloned into pGEM-T Easy (Promega) to generate pGcrp-up and  
104 pGcrp-dn. pGcrp-up was digested with Sall/XbaI, and the *crp* upstream  
105 sequence-containing fragment was ligated to Sall/XbaI-digested pGcrp-dn to produce  
106 the pGcrp-updn plasmid, which contains both upstream and downstream sequences of  
107 *crp*. A Km<sup>r</sup> cassette was inserted in the XbaI-digested pGcrp-updn plasmid to  
108 generate pGcrp-updn-Km. For *pmpA* mutant, pGpmpA-updn-Km was constructed in a  
109 similar way except using primer pairs *pmpA*-upF/XbaI-*pmpA*-upR and  
110 XbaI-*pmpA*-dF/*pmpA*-dnR. The DNA fragment containing the Km<sup>r</sup>  
111 cassette-disrupted combined upstream and downstream sequences of *crp* or *pmpA* was  
112 cleaved by Sall/SphI from pGcrp-updn-Km or pGpmpA-updn-Km, and ligated into  
113 Sall/SphI-cleaved pUT-Km1 to generate pUTcrp-Km and pUTpmpA-Km,  
114 respectively. The *pmpA/crp* double mutant (Km<sup>r</sup> Gm<sup>r</sup>) was constructed in a similar  
115 way using an existing *pmpA* mutant (Km<sup>r</sup>). A *xyIE*/Gm<sup>r</sup> cassette was inserted in the  
116 XbaI-digested pUTcrp-Km plasmid for the *pmpA/crp* double mutant to generate  
117 pUTcrp-*xyIE*/Gm. Gene inactivation mutagenesis by homologous recombination and

118 confirmation of mutants with double-crossover events by colony PCR and Southern  
119 blot hybridization were performed (Supplementary Fig. S1a, b, c, and Supplementary  
120 Fig. S3) as described previously<sup>2</sup>.

121 For complementation of *crp* mutant, the fragment containing full-length *crp* gene  
122 was amplified by PCR using the primer pair *crp-comF/crp-comR*, and cloned into  
123 pGEM-T Easy to generate the plasmid pGcrp-com. *crp* is thus driven by its own  
124 promoter. The plasmid pGcrp-com was then transformed into the *crp* mutant to  
125 generate the *crp*-complemented strain.

126 **Growth curve analysis.** Bacteria were grown overnight at 37°C, the cultures were  
127 diluted to an initial optical density at 600 nm (OD<sub>600</sub>) of 0.01 and then the OD<sub>600</sub>  
128 values were measured at 1-h intervals up to 24 h with a spectrophotometer.

129 **Swimming assay.** The swimming migration was determined on 0.3% (w/v) LB agar  
130 plates with 10% glucose or not after incubation for 16 h at 37°C.

131 **Nucleotide sequence accession number.** The nucleotide sequences of *P. mirabilis*  
132 *crp* gene have been deposited in GenBank under the accession number KP278143.

133

134 **Supplementary References**

- 135 1. Wang, M. C., Chien, H. F., Tsai, Y. L., Liu, M. C. & Liaw, S. J. The RNA  
136 chaperone Hfq is involved in stress tolerance and virulence in uropathogenic  
137 *Proteus mirabilis*. *PLoS One* **9**, e85626; 10.1371/journal.pone.0085626  
138 (2014).
- 139 2. Liu, M. C., Kuo, K. T., Chien, H. F., Tsai, Y. L. & Liaw, S. J. New aspects of  
140 RpoE in uropathogenic *Proteus mirabilis*. *Infect. Immun.* **83**, 966-977 (2015).
- 141 3. Datsenko, K. A. & Wanner, B. L. One-step inactivation of chromosomal genes  
142 in *Escherichia coli* K-12 using PCR products. *Proc. Natl. Acad. Sci. U. S. A.*  
143 **97**, 6640-6645 (2000).
- 144 4. Schweizer, H. P. & Hoang, T. T. An improved system for gene replacement  
145 and *xylE* fusion analysis in *Pseudomonas aeruginosa*. *Gene* **158**, 15-22  
146 (1995).
